1 **Faster post-malnutrition weight gain during childhood is associated with risk of non-**  
2 **communicable disease in adult survivors of severe malnutrition**

3 *Debbie S. Thompson<sup>1</sup>, Kimberley McKenzie<sup>1</sup>, Charles Opondo<sup>2</sup>, Michael S. Boyne<sup>3</sup>, Natasha Lelijveld<sup>4,5</sup>,*  
4 *Jonathan Wells<sup>6</sup>, Tim J. Cole<sup>6</sup>, Kenneth Anujuo<sup>4</sup>, Mubarek Abera<sup>7</sup>, Melkamu Berhane<sup>7</sup>, Marko Kerac<sup>4,5</sup>,*  
5 *CHANGE Study Collaborators Group\*, Asha Badaloo<sup>1</sup>*

6 <sup>1</sup>Caribbean Institute for Health Research, The University of the West Indies, Kingston, Jamaica

7 <sup>2</sup>Department of Medical Statistics, Faculty of Epidemiology & Population Health, London  
8 School of Hygiene & Tropical Medicine, London, UK

9 <sup>3</sup>Department of Medicine, The University of the West Indies, Kingston, Jamaica

10 <sup>4</sup>Department of Population Health, Faculty of Epidemiology and Population Health, London  
11 School of Hygiene and Tropical Medicine, London, UK

12 <sup>5</sup>Centre for Maternal, Adolescent & Reproductive Child Health (MARCH), London School of  
13 Hygiene & Tropical Medicine, London, UK

14 <sup>6</sup>UCL Great Ormond Street Institute of Child Health, London, UK

15 <sup>7</sup>Jimma University, Ethiopia

16 \*CHANGE Study collaborators group: Stephen A. Wootton, Albert Koulman, Amir Kirolos,  
17 Gerard Bryan Gonzales, Jonathan Swann, Abena S. Amoah.

18 **Abstract**

19 **Background:** Nutritional rehabilitation during severe malnutrition (SM) aims to rapidly restore  
20 body size and minimize poor short-term outcomes. We hypothesized that too rapid weight gain  
21 during and after treatment might however predispose to cardiometabolic risk in adult life.

22 **Methods:** Weight and height during hospitalization and one year post-hospitalization were  
23 abstracted from hospital records of children who survived SM. Six definitions of post-malnutrition  
24 weight gain/growth were analysed as continuous variables, quintiles and latent classes in age-sex  
25 and minimum weight-for-age z-scores-adjusted regression models against adult anthropometry,  
26 body composition (DEXA), blood pressure, blood glucose, insulin, and lipids.

27 **Results:** 60% of 278 participants were male, mean (SD) age 28.2 (7.7) years, mean (SD) BMI 23.6  
28 (5.2) kg/m<sup>2</sup>. Mean admission age for SM was 10.9 months (range 0.3-36.3 months) and 207/270  
29 (77%) were wasted (weight-for-height z-score<-2). During childhood, mean rehabilitation weight  
30 gain (SD) was 10.1(3.8) g/kg/day and 0.8(0.5) g/kg/day in the first year post-hospitalization.  
31 Rehabilitation weight gain >12.9 g/kg/day was associated with higher adult BMI

32 (difference=0.5kg/m<sup>2</sup>, 95%CI: 0.1-0.9,  $p = 0.02$ ), waist circumference (difference=1.4cm, 95%CI:  
33 0.4-2.4,  $p=0.005$ ), fat mass (difference = 1.1kg, 95%CI: 0.2-2,  $p=0.02$ ), fat mass index  
34 (difference=0.32, 95%CI: -0.0001-0,  $p=0.05$ ), and android fat mass (difference=0.09 kg, 95%CI:  
35 0.01-0.2,  $p=0.03$ ). Rehabilitation (g/month) and post-hospitalization (g/kg/month) weight gain  
36 were associated with greater lean mass (difference = 0.7 kg, 95% CI: 0.1, 1.3,  $p = 0.02$ )  
37 (difference=1.3kg, 95% CI: 0.3-2.4,  $p=0.015$ ) respectively.

38 **Conclusion:** Rehabilitation weight gain exceeding 13g/kg/day was associated with adult adiposity  
39 in young, normal-weight adult SM survivors. This raises questions around existing malnutrition  
40 weight gain targets and warrants further studies exploring optimal post-malnutrition growth.

41

42 **Keywords:** Severe malnutrition, post malnutrition growth, rehabilitation weight gain, weight-  
43 for-age z-scores, height-for-age z scores, weight-for-height z scores

44

45

46

47

48

49

50

51

52

53

54

## 55 **Introduction**

56 Severe malnutrition (SM) remains an important cause of mortality globally, and malnutrition  
57 contributes to the deaths of 500,000 children under the age of 5 years annually [1]. As global  
58 efforts improve the management of these children, alongside increased availability of ready to use  
59 therapeutic foods, the mortality from severe malnutrition is declining in some settings. However,  
60 while the short-term outcomes of severe childhood malnutrition may be improving, the long-term  
61 consequences are less clear. Although there is evidence of an association between prenatal  
62 undernutrition and later risk of chronic non-communicable diseases (NCDs) [2, 3], much of this  
63 evidence is from developed countries. Additionally, evidence of similar links between early  
64 postnatal malnutrition and later NCDs is recent and limited [4-6], and potential mechanisms are  
65 yet to be identified.

66 Most malnutrition treatment programs treat the attainment of normal weight-for-height as an  
67 indicator of recovery and aim for this to occur as rapidly as possible. To this end, energy dense  
68 feeds are usually provided during the rehabilitation stage of treatment of severe malnutrition;  
69 children are fed increasing amounts of energy and protein-enriched feeds to achieve a normal body  
70 weight. The recommended energy intake during this period is 100-135 kcal/kg/day [7] with the  
71 goal being a weight gain of  $\geq 10$  g/kg/day as recommended by the World Health Organization  
72 (WHO) [8]. However, it is unclear whether better short-term outcomes are occurring at the expense  
73 of longer-term outcomes. The thrifty phenotype hypothesis proposes that poor infant growth is a  
74 risk factor for the subsequent development of type 2 diabetes and the metabolic syndrome due to  
75 the effects of poor early-life nutrition [9]. In such “metabolically thrifty” individuals, faster weight  
76 gain in the plastic developmental period of infancy could pose an additional risk for later NCDs  
77 [10].

78 Many countries with high levels of early childhood malnutrition also have high burdens of obesity  
79 and NCDs including hypertension, type 2 diabetes and cardiovascular disease [11]. Data from the  
80 WHO indicate that NCDs are the leading causes of death and disability globally, killing more than  
81 three in five people worldwide and responsible for more than half the global burden of disease  
82 [12]. NCDs also cause and perpetuate poverty while hindering economic development in low- and  
83 middle-income countries (LMICs) as they struggle with the economic burden of providing  
84 treatment for individuals with NCDs, thus recapitulating the cycle.

85 This study aims to explore rehabilitation and post-hospitalization weight gain and growth in  
86 children who were hospitalized with severe malnutrition, and to investigate the associations  
87 between weight gain during and after rehabilitation and adult obesity, body composition and NCD  
88 risk. We hypothesize that faster rates of growth during nutritional rehabilitation are associated with  
89 later NCD risk.

90

## 91 **Methods**

92 Setting: We conducted secondary analysis of data collected from members of the LION (Long-  
93 term Implications of Nutrition) Cohort. The LION Cohort was retrospectively assembled and from  
94 individuals who were admitted to the Tropical Metabolism Research Unit (TMRU) ward at the  
95 University Hospital of the West Indies between the years 1963-1993 with a diagnosis of severe  
96 malnutrition. Members of the cohort were followed up and as adults and were extensively  
97 characterised in 2008-2012 in the Jamaica Marasmus and Kwashiorkor Adult Survivors  
98 (JAMAKAS) Study (**Figure 1**) [4, 13-15]. All adult severe malnutrition survivors followed up in  
99 the JAMAKAS Study for whom childhood hospital admission records were available were  
100 included in this analysis. The Mona Campus Research Ethics Committee of the University of the

101 West Indies approved the study (CREC-MN. 204 20/21) and all participants provided written  
102 informed consent.

103 During hospitalization for severe malnutrition, treatment began with a “stabilisation” phase during  
104 which a diet was offered to provide energy for weight maintenance while treating acute  
105 complications such as infections, mineral and fluid imbalances. Since the 1960s, metabolism  
106 research has informed development of treatment guidelines in the TMRU [16] which led to a  
107 gradual standardisation of the approach by about the mid-1970s [17]. Since then, the treatment  
108 regime has been similar to the guidelines by WHO [18]. With clinical improvement, resolution of  
109 oedema and improved appetite and affect, the “rehabilitation” phase occurred, during which  
110 children were fed increasing amounts of energy and protein-enriched feeds to attain a body weight  
111 similar to WHO (1981) guidelines [18]. The final phase of treatment, referred to as “recovery”,  
112 involved weaning the child to an age-appropriate diet before discharge from hospital. Children  
113 were discharged having attained weight-for-height  $\geq 90\%$  (NCHS) and were followed up as  
114 outpatients for up to two years post-hospitalization. During this period, they were fed a home-  
115 based diet.

116 Participant Characteristics: Childhood data abstracted from hospital records included admission  
117 weight, height and mid-upper arm circumference (MUAC) as well as weight, height/length and  
118 MUAC during hospitalization and one year post-discharge from hospital. Adult data were  
119 collected at the time of the JAMAKAS Study and included a detailed medical and drug history,  
120 anthropometry, blood pressure, body composition (by dual-energy x-ray absorptiometry, GE  
121 Lunar Prodigy), fasting glucose, insulin and serum lipids as described previously [19].

122 Exposure variables: We derived six definitions of post-malnutrition growth rate (PMGr) based on  
123 available data and established assessment methods (**Table 1**). The first three definitions (PMGr 1-

124 3) were derived from in-patient weight and age data starting at the time of minimum weight, which  
 125 was usually at admission or after oedema had resolved and continuing until the time of maximum  
 126 weight during treatment. The definitions respectively utilized the daily change in weight-for-age  
 127 z-score (WAZ) (using WHO 2006 growth standards) (PMGr1), g/kg of body weight (PMGr2) and  
 128 weight in grams (PMGr3) (**Table 1**), all common measures of growth in malnutrition programs.  
 129 Height-for-age z-score (HAZ) was not used during this period as height gain was small. Due to  
 130 individual variations in the attainment of maximum weight, weight gain was expressed ‘per day’.  
 131 The remaining three definitions (PMGr 4-6) represented weight gain and height gain from the time  
 132 of hospital discharge until one year post-discharge. For these definitions, WAZ (PMGr4), g/kg  
 133 (PMGr 5) and HAZ (PMGr 6) were expressed as rate of change per month (**Table 1**).

134

135 **Table 1:** Definitions of post malnutrition growth (PMGr)

| PMGr class | Abbreviated title  | Definition                                                    | Time                                                                    |
|------------|--------------------|---------------------------------------------------------------|-------------------------------------------------------------------------|
| 1          | $\Delta$ WAZ/day   | Average change in WAZ per day                                 | Date of minimum weight to date of maximum weight during hospitalization |
| 2          | g/kg/day           | Average change in grams per kilogram of body weight per day   |                                                                         |
| 3          | g/day              | Average change in grams per day                               |                                                                         |
| 4          | $\Delta$ WAZ/month | Average change in WAZ per month                               | Date from hospital discharge to one year post-hospitalization           |
| 5          | g/kg/month         | Average change in grams per kilogram of body weight per month |                                                                         |
| 6          | $\Delta$ HAZ/month | Average change in HAZ per month                               |                                                                         |

136 WAZ- weight-for-age z-scores, HAZ-height-for-age z-scores

137

138 Outcome variables included BMI, waist circumference, fat mass, fat mass index, % fat mass,  
 139 android fat, android: gynoid (AG) fat ratio (android fat divided by gynoid fat; a pattern of body fat

140 distribution associated with an increased risk for metabolic syndrome in healthy adults), lean mass,  
141 lean mass index, systolic blood pressure, diastolic blood pressure, fasting glucose, fasting insulin,  
142 LDL-cholesterol, triglyceride, and homeostatic model assessment for insulin resistance (HOMA-  
143 IR). Body composition (height-adjusted lean mass and fat mass) was assessed by dual-energy X-  
144 ray absorptiometry (DEXA).

145 Lean mass index based on DEXA was calculated using the formula: lean mass/height<sup>2</sup>, and  
146 similarly fat mass index based on DEXA was calculated using the formula: fat mass/height<sup>2</sup>, each  
147 in BMI units of kg/m<sup>2</sup>. HOMA-IR was calculated using the formula:

$$148 \quad \text{HOMA-IR} = \text{fasting insulin (microU/L)} \times \text{fasting glucose (mmol/L)} / 22.5.$$

149 Statistical Analyses: To determine the relationship between PMGr and adult body size, body  
150 composition and NCD risk factors, we conducted separate linear regression analyses for each  
151 outcome adjusted for age and sex and (as an additional model) minimum WAZ (i.e., WAZ at the  
152 time of minimum weight). Additionally, all outcome measures of body composition and blood  
153 pressure were adjusted for adult height. Adult BMI was treated as an outcome variable and not  
154 adjusted for in the analyses as it was considered to be on the causal pathway between post  
155 malnutrition weight gain and the outcomes. Each PMGr definition was evaluated as a continuous  
156 variable, and we reported differences in continuous outcomes per unit faster growth depending on  
157 the definition of PMGr. Based on the six definitions of post malnutrition growth, participants were  
158 also grouped into quintiles which were used in age- and sex-adjusted regression analyses as ordinal  
159 variables. Quintiles 1 (Q1) and 5 (Q5) represented the slowest and fastest rates of growth  
160 respectively, and age- and sex-adjusted regression analyses were conducted comparing NCD risk  
161 across the growth rate quintiles. Finally, a latent class analysis (LCA) was conducted to identify  
162 qualitatively different growth pattern subgroups of the study population across 5 time points, viz.,

163 admission, time at minimum weight, time at maximum weight, discharge from hospital and one  
164 year post-hospitalization. The LCA was fitted using a generalised structural equation model with  
165 Gaussian-distributed outcomes at each of the timepoints included in the analysis. Model fit was  
166 assessed using Akaike Information Criteria (AIC); latent classes were extracted from the model  
167 with the lowest AIC, and which yielded reasonably-sized classes. These LCA-predicted classes  
168 were plotted against anthropometric, body composition and clinical markers of NCD risk to  
169 facilitate interpretation. Stata version 16.0 (StataCorp LLC, College Station, Texas, USA) was  
170 used to conduct the statistical analyses and  $p$ -values  $\leq 0.05$  were considered statistically  
171 significant.

172

## 173 **Results**

174 There were 1,366 children in the original TMRU/UHWI cohort, 47 of whom died during treatment  
175 for malnutrition and the remaining 1,289 were discharged alive. The JAMAKAS study traced 729  
176 adult survivors from the original cohort and enrolled 316 of them to the study. Subsequently, this  
177 current ‘CHANGE’ (Child malnutrition & adult NCD: Generating evidence on mechanistic links  
178 to inform future policy/practice) Study identified 278 adult participants for whom childhood  
179 admission records were available for inclusion to this study. **Figure 1** summarises the recruitment  
180 of the adult survivors of severe malnutrition.

181 We analysed data for 278 adults (60% male) who were treated for severe malnutrition as children.  
182 Mean age at admission was 10.9 months, 237/270 (88%) were stunted (HAZ < -2), 207/270 (77%)  
183 and 185/214 (87%) were wasted (WHZ < -2 and MUAC < 12.5 cm respectively) and 182/278 (65%)  
184 had oedematous malnutrition. As adults, mean age (SD) was 28.2 (7.7) years, and mean BMI (SD)  
185 was 23.6 (5.2) kg/m<sup>2</sup> (**Table 2**).



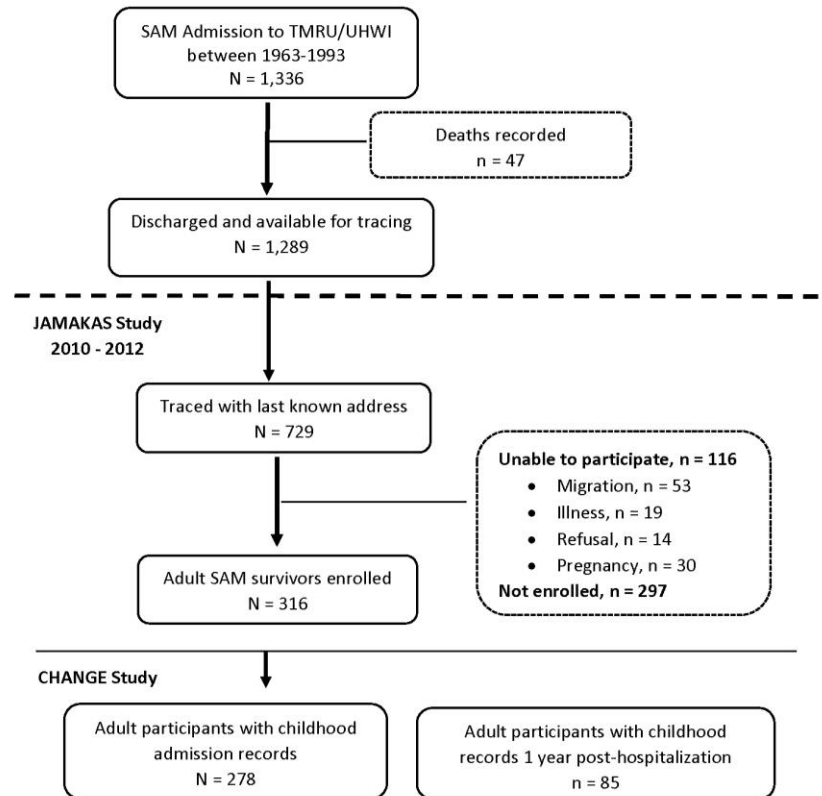

186

187 **Figure 1: Flow chart detailing recruitment of adult survivors of severe malnutrition ( $n =$**   
 188 **278).** “Unable to participate” includes adult survivors of severe malnutrition who were unavailable  
 189 because of migration ( $n = 53$ ), illness ( $n = 19$ ), refusal ( $n = 14$ ), or pregnancy ( $n = 30$ ). TMRU,  
 190 Tropical Metabolism Research Unit; UHWI, University Hospital of the West Indies; JAMAKAS,  
 191 Jamaica Marasmus and Kwashiorkor Adult Survivors.

192

193

194

195

196

197

198

199

200

201

202 **Table 2:** Clinical characteristics of 278 survivors of severe malnutrition as children and as  
203 adults.

| Children | Characteristics                              | At Admission    | At Discharge    | At 1 year PH    |
|----------|----------------------------------------------|-----------------|-----------------|-----------------|
|          |                                              | N = 278         | n= 276          | n = 85          |
|          | Age (months)                                 | 11.9 (0.33 -36) | 13.7 (3 - 42)   | 26.1 (15- 45)   |
|          | % Male                                       | (167) 60.1 %    | 60.1%           | 56.5%           |
|          | % Oedema                                     | (182) 65.5%     | (0) 0%          | (0) 0%          |
|          | Weight (kg)                                  | 5.4 (1.5), 278  | 7.3 (1.8), 276  | 9.8 (1.6), 85   |
|          | Height (cm)                                  | 64.6 (7.0), 270 | 66.5 (7.2), 195 | 80.1 (5.6), 81  |
|          | MUAC (cm)                                    | 10.8 (1.6), 214 | 12.9 (1.2), 33  | 14.(1.5), 18    |
|          | % Underweight (WAZ<-2)                       | 92              | 63              | 41              |
|          | % Stunted (HAZ<-2)                           | 88              | 88              | 59              |
|          | % Wasted (MUAC < 12.5cm)                     | 87              | 27              | 17              |
|          | % Wasted (WHZ < -2)                          | 77              | 5               | 15              |
|          | Days since admission                         | 0               | 55 (13 - 251)   | 412 (343 - 588) |
|          |                                              |                 |                 |                 |
|          |                                              |                 |                 |                 |
| Adults   | Characteristics                              | All             | Male            | Female          |
|          |                                              | N = 278         | n = 167         | n= 111          |
|          | Years since discharge                        | 27.2 (16-51)    | 27.3 (16-51)    | 26.5 (17-46)    |
|          | Age (years)                                  | 28.2 (7.7)      | 28.5 (7.9)      | 27.7 (7.4)      |
|          | Weight (kg)                                  | 66.1 (14.9)     | 65.5 (11.7)     | 67 (18.7)       |
|          | Height (cm)                                  | 167.5 (9.0)     | 171.1 (7.6)     | 162 (7.8)       |
|          | BMI (kg/m <sup>2</sup> )                     | 23.6 (5.2)      | 22.3 (3.4)      | 25.4 (6.7)      |
|          | Waist circumference (cm)                     | 78.8 (12.7)     | 76.3 (8.9)      | 82.6 (16.2)     |
|          | Waist-hip ratio                              | 0.83 (0.06)     | 0.83 (0.06)     | 0.82 (0.07)     |
|          | Diastolic blood pressure (mmHg)              | 71 (11)         | 71 (11)         | 71 (12)         |
|          | Systolic blood pressure (mmHg)               | 114 (12)        | 116 (12)        | 112 (13)        |
|          | Lean mass (kg)                               | 48.4 (10.4)     | 54.4 (7.5)      | 39.3 (6.9)      |
|          | Lean mass index (kg/m <sup>2</sup> )         | 17.1 (2.6)      | 18.5 (2.0)      | 14.9 (1.8)      |
|          | Fat mass (kg)                                | 14.4 (13.2)     | 8.0 (7.3)       | 24.2 (14.1)     |
|          | Fat mass index (kg/m <sup>2</sup> )          | 5.3 (5.0)       | 2.7 (2.5)       | 9.2 (5.3)       |
|          | % Fat                                        | 21.2 (15.5)     | 11.8 (8.6)      | 35.4 (12.5)     |
|          | Android fat mass (kg)                        | 1.1 (1.2)       | 0.64 (0.68)     | 1.9 (1.4)       |
|          | Android fat %                                | 24.1 (17.5)     | 14.4 (11)       | 38.8 (15)       |
|          | Android-gynoid fat ratio                     | 0.9 (0.22)      | 0.9 (0.20)      | 0.9 (0.24)      |
|          | Fasting blood glucose (mmol/L) <sup>‡</sup>  | 4.6 (0.5)       | 4.7 (0.4)       | 4.5 (0.5)       |
|          | Fasting serum insulin (uIU/mL) <sup>‡†</sup> | 4.7 (3.6)       | 3.3 (3.2)       | 6.3 (3.4)       |
|          | HOMA-IR <sup>†</sup>                         | 0.9 (0.7)       | 0.7 (0.7)       | 1.3 (0.7)       |
|          | LDL-cholesterol <sup>†</sup> (mmol/L)        | 2.1 (0.7)       | 2.0 (0.6)       | 2.3 (0.7)       |
|          | Triglyceride <sup>†</sup> (mmol/L)           | 0.7 (0.4)       | 0.7 (0.3)       | 0.7 (0.4)       |

204 N = 278. PH = post-hospitalization. Z-scores based on WHO 2006 and 2007 references. Data are  
205 presented as means (± SDs) or (range). (‡, ‡†, †) n = 95, 83 and 82 respectively.

206  
207 Subsequent analyses were based on 273 participants during rehabilitation and 84 participants post-  
208 hospitalization as some participants had missing maximum weight or discharge weight data. In  
209 273 participants, mean weight gain during rehabilitation was, according to the three definitions,

210 0.07 WAZ/day, 10.1 g/kg/day and 62 g/day (**Table 3**). Mean (SD) change in WAZ during  
 211 rehabilitation was 2.2 (0.97). In the post-hospitalization phase, weight gain was much lower; mean  
 212 (SD) weight gain was 0.8 (0.5) g/kg/day and mean (SD) change in WAZ/ day was 0.002 (0.004)  
 213 for 84 participants. Each PMGr definition was grouped in quintiles (**Table 3 and Figure 2**)

214 **Table 3:** Descriptive data for definitions of post-malnutrition growth (PMGr)  
 215

| PMGr Class     | Description         | Mean (SD)    | Range         |
|----------------|---------------------|--------------|---------------|
| 1<br>(n = 273) | $\Delta$ WAZ/ day   | 0.07 (0.03)  | -0.0025, 0.20 |
|                | Q1                  | 0.03 (0.01)  | -0.00, 0.04   |
|                | Q2                  | 0.05 (0.00)  | 0.04, 0.06    |
|                | Q3                  | 0.06 (0.00)  | 0.06, 0.07    |
|                | Q4                  | 0.08 (0.00)  | 0.07, 0.09    |
|                | Q5                  | 0.11 (0.02)  | 0.09, 0.20    |
| 2<br>(n = 273) | g/kg/day            | 10.1 (3.8)   | 0.32 - 27     |
|                | Q1                  | 5.5 (1.3)    | 0.3, 7.0      |
|                | Q2                  | 7.9 (0.6)    | 7.0, 8.9      |
|                | Q3                  | 9.7 (0.5)    | 8.9, 10.7     |
|                | Q4                  | 11.8 (0.6)   | 10.7, 12.9    |
|                | Q5                  | 15.7 (2.9)   | 12.9, 27.4    |
| 3<br>(n = 273) | g/day               | 61.6 (25.3)  | 2.5 - 189     |
|                | Q1                  | 31.8 (8.0)   | 2.5, 41.0     |
|                | Q2                  | 46.9 (3.1)   | 41.4, 51.7    |
|                | Q3                  | 58.6 (3.9)   | 52.0, 64.8    |
|                | Q4                  | 71.6 (5.1)   | 65.0, 81.0    |
|                | Q5                  | 99.9 (20.5)  | 81.1, 188.7   |
| 4<br>(n = 84)  | $\Delta$ WAZ/ month | 0.05 (0.1)   | -0.22 - 0.46  |
|                | Q1                  | -0.09 (0.06) | -0.22, -0.03  |
|                | Q2                  | -0.01 (0.01) | -0.03, 0.01   |
|                | Q3                  | 0.05 (0.02)  | 0.01, 0.08    |
|                | Q4                  | 0.11 (0.02)  | 0.08, 0.15    |
|                | Q5                  | 0.21 (0.08)  | 0.15, 0.46    |
| 5<br>(n = 84)  | g/kg/month          | 24.9 (15.6), | -0.5 - 7.1    |
|                | Q1                  | 5.4 (8.0)    | -12.9, 14.4   |
|                | Q2                  | 16.9 (2.4)   | 14.6, 20.9    |
|                | Q3                  | 24.5 (2.2)   | 21.4, 28.0    |
|                | Q4                  | 32.0 (3.3)   | 28.1, 37.2    |
|                | Q5                  | 47.2 (12.9)  | 37.8, 90.2    |
| 6<br>(n = 47)  | $\Delta$ HAZ/ month | 0.10 (0.12)  | -0.08 - 0.54  |
|                | Q1                  | -0.04 (0.03) | -0.08, 0.01   |
|                | Q2                  | 0.04 (0.01)  | 0.02, 0.06    |
|                | Q3                  | 0.09 (0.01)  | 0.07, 0.11    |
|                | Q4                  | 0.14 (0.02)  | 0.12, 0.17    |
|                | Q5                  | 0.29 (0.11)  | 0.18, 0.54    |

216 PMGr - post malnutrition growth rate, Q – quintile: 1- slowest growth to 5- fastest  
 217 growth, WAZ - weight-for-age z-scores, HAZ - height-for-age z-scores

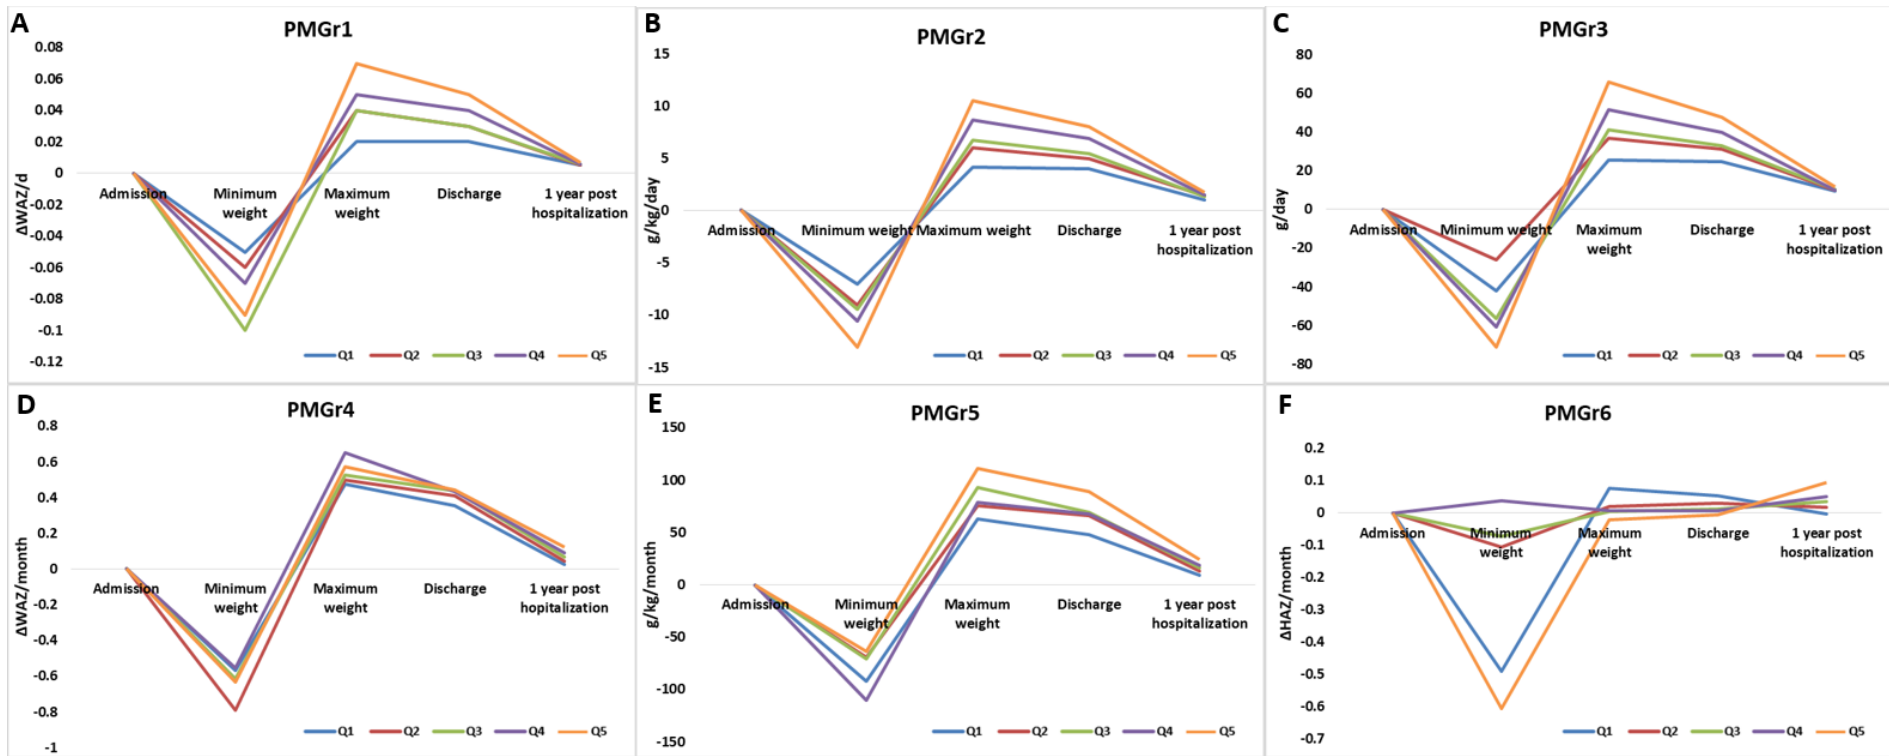

218

219 **Figure 2: Mean growth rates of growth across four time periods according to the six PMGr definitions. A to C: PMGr1 to 3**  
 220 **(rehabilitation) and D to F: PMGr4 to 6 (post-hospitalization). Each PMGr definition was split into quintiles where Q1= slowest**  
 221 **growth, and Q5 = fastest growth. PMGr at admission acted as comparator for the later timepoints.**

222 *Associations between rehabilitation weight gain and adult NCD risk*

223 The three measures of rehabilitation weight gain ( $n = 273$ ) were associated with adult NCD risk in  
224 regression models adjusted for age, sex and minimum WAZ as follows:

225 **PMGr1** as  $\Delta$ WAZ/day was associated with waist circumference (difference=53cm, 95% CI: 6,  
226 100,  $p = 0.03$ ) and lean mass (difference=37.0 kg, 95% CI: 7, 67,  $p = 0.02$ ) (**Supplementary Table**  
227 **1**). Those with fastest weight gain had higher BMI (difference =  $0.4\text{kg/m}^2$ , 95% CI: 0.02, 0.8,  $p =$   
228 0.04), waist circumference (difference = 1.2 cm, 95% CI: 0.3, 2,  $p = 0.01$ ), lean mass (difference  
229 = 0.8 kg, 95% CI: 0.2, 1.4,  $p = 0.01$ ), fat mass (difference = 0.8 kg, 95% CI: 0.01, 1.7,  $p = 0.048$ )  
230 and % fat mass (difference = 0.85, 95% CI: 0.02, 1.7,  $p = 0.04$ ) than those with slowest weight  
231 gain (**Supplementary Table 2, Figure 3**). Associations with waist circumference and % fat mass  
232 remained significant after further adjusting for adult height. Visual examination of the box plots  
233 (**Figure 3A, 3C, 3K, 3N**) suggested that only  $\Delta$ WAZ  $\geq 0.09$ /day was associated with measures of  
234 adult adiposity and when further exploratory analyses (excluding Q5) were conducted,  $\Delta$ WAZ  $<$   
235 0.09/day was not associated with adult adiposity ( $p$ -values  $> 0.2$ ) (data not shown). In the fastest  
236 weight gainers (Q5) in comparison to the slowest weight gainers (Q1),  $\Delta$ WAZ/day was associated  
237 with BMI (difference =  $2.1\text{ kg/m}^2$ , 95% CI: 0.3, 3.8,  $p = 0.02$ ), waist circumference (difference =  
238 6.5 cm, 95% CI: 2, 11,  $p = 0.002$ ), waist-hip ratio (difference = 0.03, 95% CI: 0.003, 0.05,  $p =$   
239 0.03), fat mass (difference = 4.0 kg, 95% CI: 0.2, 8,  $p = 0.04$ ) and android fat mass (difference =  
240 0.36 kg, 95% CI: 0.01, 0.7,  $p = 0.05$ ) (data not shown).

241 **PMGr2** as weight gain in g/kg/day was associated with waist circumference (difference = 0.43  
242 cm, 95% CI: 0.1, 0.8,  $p = 0.02$ ) and lean mass (difference = 0.28 kg, 95% CI: 0.05, 0.5,  $p = 0.02$ )  
243 (**Supplementary Table 1**). Those with fastest weight gain had higher BMI (difference =  $0.5\text{ kg/m}^2$ ,  
244 95% CI: 0.1, 0.9,  $p = 0.02$ ), waist circumference (difference = 1.4 cm, 95% CI: 0.4, 2.4,  $p = 0.005$ ),

245 fat mass (difference = 1.1 kg, 95% CI: 0.2, 2,  $p = 0.02$ ), fat mass index (difference = 0.32 kg/m<sup>2</sup>,  
246 95% CI: -0.0001, 0.6,  $p = 0.05$ ), % fat mass (difference = 1.1, 95% CI: 0.2, 2,  $p = 0.02$ ), android  
247 fat mass (difference = 0.09 kg, 95% CI: 0.01, 0.2,  $p = 0.03$ ) and % android fat mass (difference =  
248 1.2, 95% CI: 0.1, 2,  $p = 0.03$ ) than those with slowest weight gain (**Supplementary Table 2,**  
249 **Figure 3**). The associations with waist circumference, % fat mass, android fat mass and % android  
250 fat mass remained significant after further adjusting for height (data not shown). Examination of  
251 the box plots (**Figure 3B, 3D, 3L, 3M, 3O, 3P, 3Q**) suggested that only weight gain  $\geq 12.9$   
252 g/kg/day was associated with measures of adult adiposity and when further exploratory analyses  
253 (excluding Q5) were conducted, rehabilitation weight gain  $< 12.9$  g/kg/day was not associated with  
254 adult adiposity ( $p$ -values  $> 0.3$ ) (data not shown).

255 **PMGr3** as weight gain in g/day was associated with lean mass (difference = 0.04 kg, 95% CI:  
256 0.01, 0.1,  $p = 0.02$ ) (**Supplementary Table 1**). Those with fastest weight gain had greater waist  
257 circumference (difference = 1.2 cm, 95% CI: 0.2, 2,  $p = 0.01$ ) and lean mass (difference = 0.7 kg,  
258 95% CI: 0.1, 1.3,  $p = 0.02$ ) than those with slowest weight gain (**Supplementary Table 2, Figure**  
259 **3**). Examination of the box plots (**Figure 3E**) suggested that rehabilitation weight gain  $\geq 81$  g/day  
260 was associated with adult waist circumference and when further exploratory analyses were  
261 conducted, weight gain  $< 81$  g/day was not associated with adult waist circumference ( $p$ -values  $>$   
262 0.3) (data not shown).

263 There was no association between any measure of rehabilitation weight gain (i.e., PMGr1, PMGr2,  
264 and PMGr3) and adult blood pressure, blood glucose, insulin, or lipids (**Supplementary Tables 1**  
265 **and 2**).

266

267

268 *Associations between post-hospitalization weight gain and height gain and adult NCD risk.*

269 Post-hospitalization weight gain (n = 84) and height gain (n = 47) were associated with NCD risk  
270 in regression models adjusted for age, sex and minimum WAZ as follows:

271 **PMGr4** as WAZ/month was associated with lean mass index (difference = 4.6 kg/m<sup>2</sup>, 95% CI:  
272 0.6, 9,  $p = 0.03$ ) (**Supplementary Table 1**). Those with fastest weight gain had a higher lean mass  
273 index (difference = 0.4 kg/m<sup>2</sup>, 95% CI: 0.04, 0.7,  $p = 0.03$ ) than those with the slowest weight gain  
274 (**Supplementary Table 2, Figure 3**).

275 **PMGr5** as g/kg/month was associated with lean mass index (difference = 0.03 kg/m<sup>2</sup>, 95% CI:  
276 0.01, 0.06,  $p = 0.02$ ) (**Supplementary Table 1**). The fastest weight gainers had higher lean mass  
277 (difference = 1.3 kg, 95% CI: 0.3, 2.4,  $p = 0.02$ ) and lean mass index (difference = 0.4 kg/m<sup>2</sup>, 95%  
278 CI: 0.1, 0.7,  $p = 0.03$ ) and a lower AG ratio (difference = -0.03, 95% CI: -0.07, -0.001,  $p = 0.05$ )  
279 than the slowest weight gainers (**Supplementary Table 2, Figure 3**).

280 **PMGr6** as height gain in  $\Delta$ HAZ/month was not associated with NCD outcomes and there was no  
281 difference between the fastest and slowest growers in terms of the NCD outcomes.

282 There was no association between any measure of post-hospitalization weight gain or growth (i.e.,  
283 PMGr4, PMGr5, and PMGr6) and adult blood pressure, blood glucose, insulin, or lipids  
284 (**Supplementary Tables 1 and 2**).

285

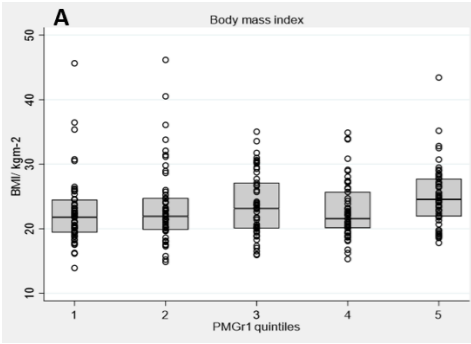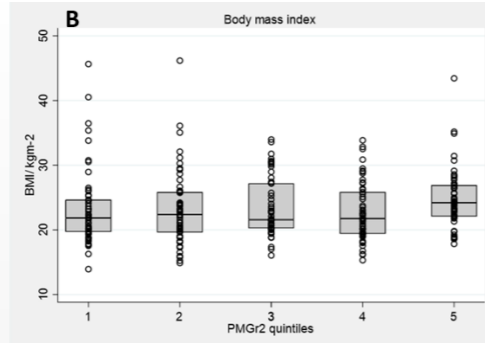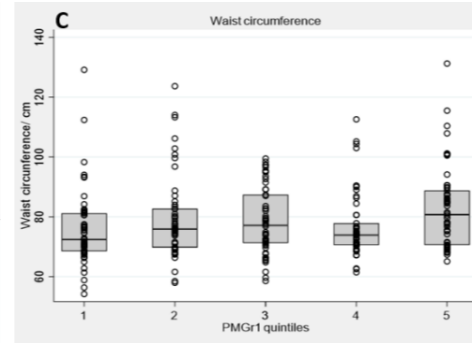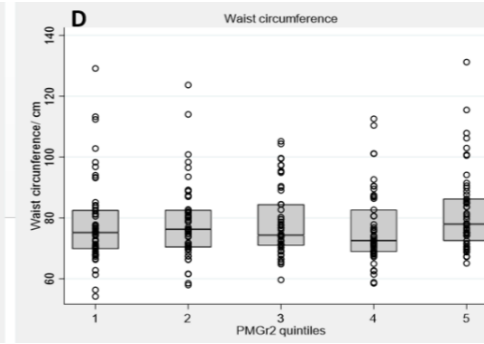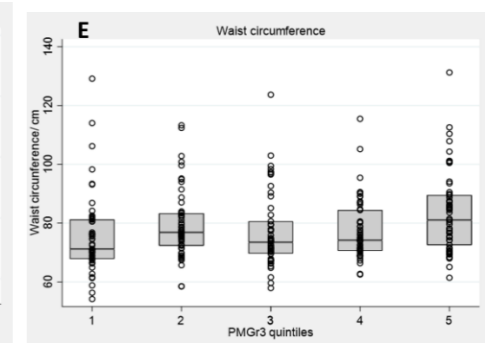

286

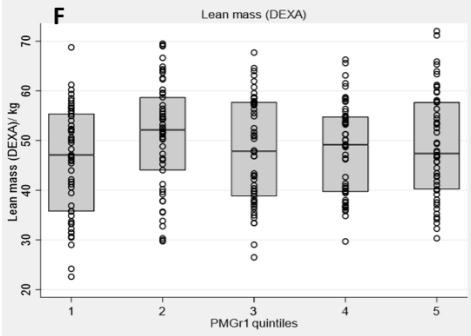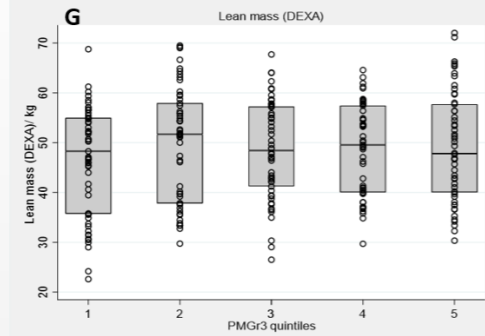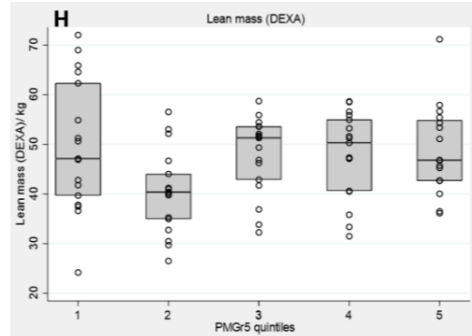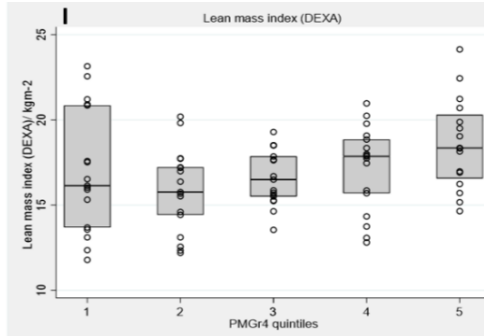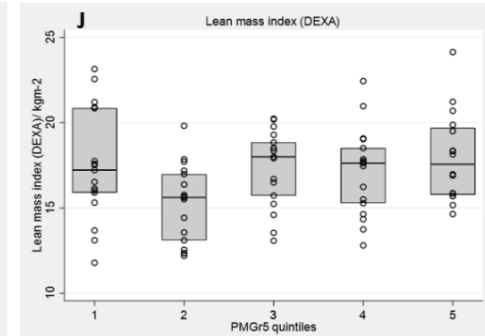

287

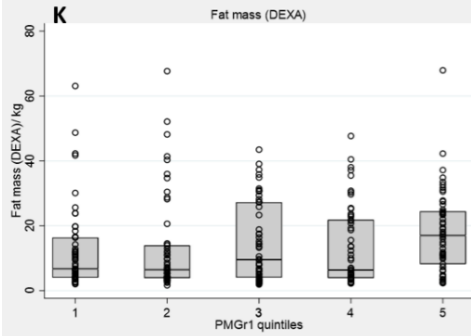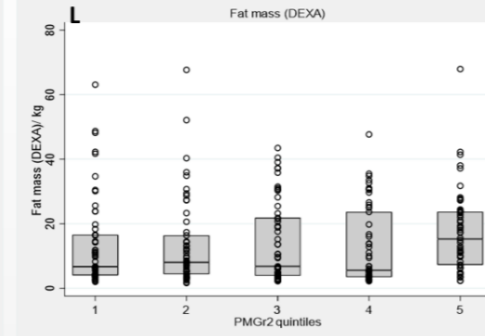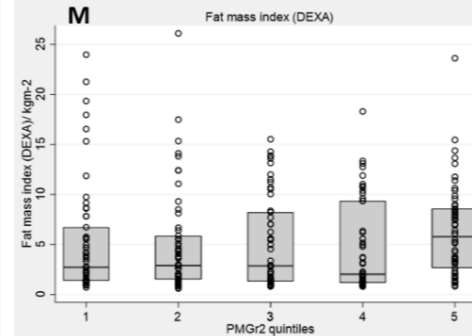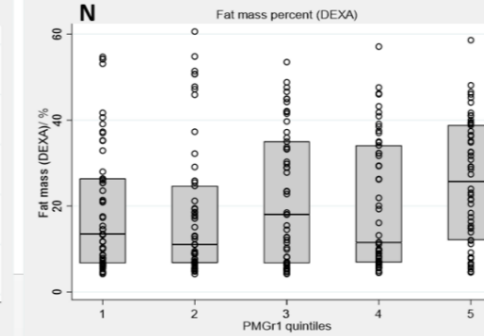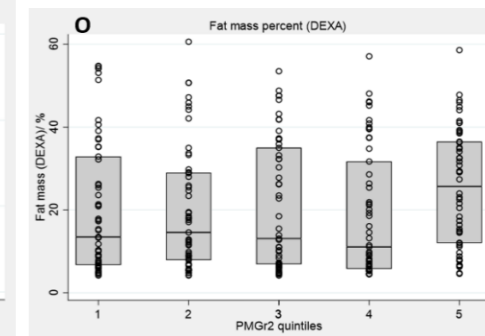

288

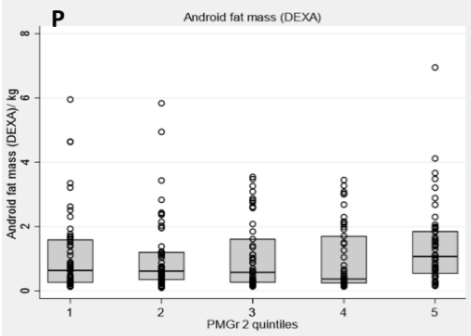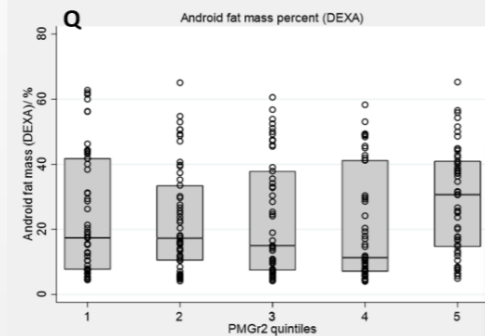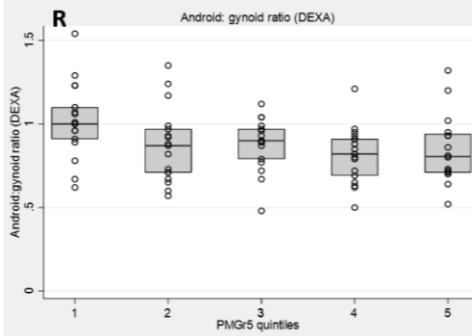



289 **Figure 3: Association of NCD outcomes with PMGr definitions.** Age, sex and minimum weight WAZ-adjusted linear regression results (coefficient,  $p$ -value): **A to B-** body mass index:  
290 PMGr1 (B = 0.4,  $p = 0.04$ ), PMGr2 (B = 0.5,  $p = 0.02$ ); **C to E-** waist circumference: PMGr1 (B = 1.2,  $p = 0.01$ ), PMGr2 (B = 1.4,  $p = 0.01$ ), and PMGr3 (B = 1.2,  $p = 0.01$ ); **F to H-** lean mass:  
291 PMGr1 (B = 0.8,  $p = 0.01$ ), PMGr3 (B = 0.7,  $p = 0.02$ ) and PMGr5 (B = 1.3,  $p = 0.02$ ); **I to J-** lean mass index: PMGr4 (B = 0.35,  $p = 0.03$ ) and PMGr5 (B = 0.43,  $p = 0.01$ ); **K to L-** fat mass:  
292 PMGr1 (B = 0.84,  $p = 0.048$ ) and PMGr2 (B = 1.1,  $p = 0.01$ ); **M-** fat mass index: PMGr2 (B = 0.32,  $p = 0.05$ ); **N to O-** fat mass percent: PMGr1 (B = 0.85,  $p = 0.04$ ) and PMGr2 (B = 1.1,  $p =$   
293 0.02); **P-** android fat mass: PMGr2 (B = 0.09,  $p = 0.03$ ); **Q-** android fat mass %: PMGr2 (B = 1.2,  $p = 0.03$ ); **R-** android-gynoid ratio: PMGr5 (B = -0.03,  $p = 0.045$ ).

294 *Latent class analysis*

295 Latent class analysis (LCA) identified a model with 6 interpretable classes of at least 21 children  
296 each which had the lowest AIC (3159) (**Figure 4**). Class 1 (10%) consisted of the children who  
297 were most underweight on admission (mean WAZ < -6) and with the least weight gain during  
298 rehabilitation. Class 2 (21%) had the second most underweight children with the second lowest  
299 rehabilitation weight gain. Class 3 (30%) were children with the second highest rehabilitation  
300 weight gain. Class 4 (18%) had the highest rehabilitation weight gain. Class 5 (13%) had the  
301 second highest WAZ at admission and the third highest rehabilitation weight gain. Class 6 (8%)  
302 were the children who were least underweight on admission. All classes have a similarly steep  
303 level of catch-up during rehabilitation, except class 4. After discharge, class 1, with the greatest  
304 deficits, continued to catch up, and there was a pattern of decreasing catch-up growth up the  
305 classes, until class 6 where “catch down” was observed (**Figure 4**).

306 Age and sex-adjusted regression analyses against the NCD outcomes were carried out with LCA  
307 class as a categorical variable and Class I being the reference group. In children in Class 5 (of  
308 which 89% had oedematous malnutrition), change in WAZ was associated with greater adult fat  
309 mass (difference = 5.2kg, SE = 2.6; 95% CI: 0.1, 10,  $p = 0.045$ ) and android fat mass (difference  
310 = 0.52 kg, SE = 0.24; 95% CI: 0.04, 0.99,  $p = 0.03$ ) compared to children in Class 1. However,  
311 these associations were no longer significant after adjusting for minimum WAZ (data not shown).

312

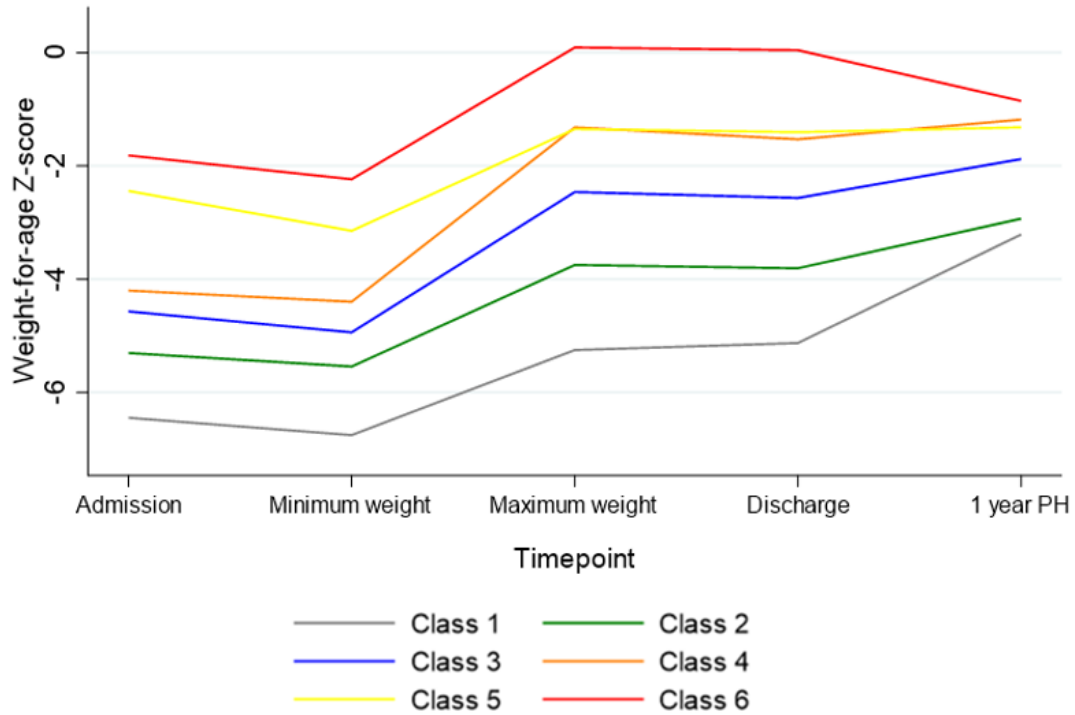

313

314 **Figure 4: Latent class analysis of patterns of weight-for-age z-score from admission for**  
315 **severe malnutrition to 1 year post-hospitalization in 278 adults.** Classes ranked by lowest  
316 WAZ upon admission: 1, 2, 3, 4, 5, 6, and by highest weight gain during rehabilitation: 4, 3, 6, 5,  
317 2, 1. PH- post hospitalization

## 318 **Discussion**

319 This study of adult survivors of severe malnutrition in childhood demonstrated that, during the  
320 rehabilitation phase of malnutrition treatment, weight gain above certain thresholds is associated  
321 with risk factors for NCDs (i.e., greater BMI, waist circumference, fat mass and android fat mass).  
322 Weight gain during the first year after hospitalization was inversely associated with android-  
323 gynoid fat ratio. Additionally, in adult survivors, faster weight gain during and after admission for  
324 severe malnutrition was associated with lean mass which is typically associated with lower NCD  
325 risk. It is important to note that these associations are independent of weight-for-age at the time of  
326 hospitalization and adult height. Neither rehabilitation weight gain nor post-hospitalization weight  
327 gain was associated with adult blood pressure or blood glucose, insulin, or lipids.

### 328 *Post-malnutrition growth and adult adiposity*

329 Weight gain targets during treatment of severe malnutrition have been in place since the 1970s,  
330 with the recommendation that a desirable rehabilitation weight gain exceeds 10g/kg/day [20]. We  
331 have demonstrated in this group of adult survivors of severe malnutrition that rehabilitation weight  
332 gain that exceeded specified thresholds was associated with adult adiposity. Measures of adiposity  
333 (i.e., BMI, waist circumference, fat mass and android fat mass) appeared similar across the first  
334 four quintiles of weight gain (defined as  $\Delta WAZ$ , g/kg/day and g/day), whereas the fifth quintile  
335 showed greater adiposity. Thus, each unit increase in weight gain does not appear to increase NCD  
336 risk in the same way, and there is a threshold effect of rehabilitation weight gain on adult adiposity.  
337 This suggests that weight gain at or above specific thresholds (i.e., 13 g/kg/day,  $\Delta WAZ > 0.09$ /day,  
338 81g/day) could impute greater adult adiposity.

339 Faster rehabilitation weight gain was associated with greater adult BMI (an indicator of excess or  
340 inadequate weight) which itself is an independent risk factor for cardiovascular disease. Weight

341 gain above the previously specified thresholds was also associated with increased fat mass, and  
342 this excess adipose tissue contributes to the production of proinflammatory cytokines which are  
343 also associated with increased risk of cardiovascular disease. Importantly, faster rehabilitation  
344 weight gain was associated with fat mass index, which has been shown to be a more complete  
345 tool for diagnosing obesity than both BMI and fat mass as it differentiates fat and muscle mass of  
346 the total body weight [21]. Furthermore, fat accumulation in the android compartment is  
347 specifically known to be associated with increased cardiovascular and metabolic risk [22] and  
348 studies in younger populations have also demonstrated that android fat is more closely related to  
349 metabolic risk factors [23]. This tendency for some adult survivors of severe malnutrition to  
350 accumulate visceral fat may be a consequence of adipose tissue maldevelopment which includes  
351 altered body composition and increased visceral fat [24]. Rapid postnatal infant weight gain has  
352 been shown to be associated with increases in both visceral and abdominal subcutaneous adipose  
353 tissue, as well as total adiposity and the risk of obesity in middle adulthood [25]. Additionally,  
354 increased visceral adipose tissue is linked to high triglycerides and low HDL cholesterol levels  
355 [26]. However, while the tendency to store fat abdominally might be a persisting response to  
356 adverse conditions and growth failure in fetal life and infancy, we have shown this tendency to  
357 store fat in the abdominal compartment to be independent of minimum weight-for age z-score  
358 during hospitalization. Therefore, the association between post-malnutrition weight gain in  
359 childhood and adult android fat in this group of young, normal-weight severe malnutrition  
360 survivors could signal an increased risk of clinical NCDs as they age.

361 It is also important to point out that although our findings indicate statistically significant  
362 associations across the range of weight and body composition markers of NCD risk, these  
363 individuals have not exceeded established thresholds for adverse outcomes such as obesity. So,

364 while faster weight gain was associated with higher adult BMI, only 11% of these participants  
365 were obese (i.e., BMI >30 kg/m<sup>2</sup>). Additionally, several studies have reported a lower  
366 susceptibility to visceral adipose tissue deposition in blacks compared to whites [27, 28].  
367 Therefore, although it is unclear whether the levels of visceral fat in these study participants are  
368 sufficient to impute cardiometabolic risk, the possibility cannot be ruled out.  
369 Our study produced the unexpected finding of an inverse association between post-hospitalization  
370 weight gain (g/kg/month) and android-gynoid percent fat ratio (AG), an important predictor of  
371 metabolic and cardiovascular disease risk. Indeed, in over 1,800 participants with a mean age of  
372 35 years, AG was reported to have a greater association with cardiometabolic dysregulation than  
373 android fat, gynoid percent fat or BMI [29]. While our findings are counterintuitive, they further  
374 emphasize the complexity of these associations which may depend not only on the extent and rate  
375 of weight gain, but also the age of the child at the time of weight gain, and other factors outside  
376 the scope of this study.

#### 377 *Post-malnutrition growth and adult lean mass*

378 Lean mass in adult survivors of severe malnutrition was associated with both rehabilitation and  
379 post-hospitalization weight gain. While greater lean mass is generally associated with reduced  
380 NCD risk, the association of lean mass with health appears complex [30]. Although lean mass  
381 incorporates muscle mass, which is widely considered to protect against diabetes, high levels of  
382 lean mass have been associated with higher blood pressure [31]. Additionally, it is possible that  
383 in this group, lean mass is accreted in tandem with fat mass, with the benefit of higher lean mass  
384 being obscured by the deleterious effects of fat (particularly visceral fat) accumulation.

385

386

387 *The role of minimum WAZ*

388 It is important to establish the role of minimum weight-for-age in these analyses as it has been  
389 reported that the most underweight children tend to gain more weight during nutritional  
390 rehabilitation. In our participants, however, most of the reported associations between both  
391 rehabilitation and post-hospitalization weight gain and adult adiposity were independent of  
392 minimum WAZ. However, in one subgroup of participants identified by latent class analysis,  
393 minimum WAZ appears to be influential. Therefore, the relative importance of rehabilitation  
394 weight gain versus admission WAZ in predicting NCD risk in these adult survivors may be  
395 dependent on how weight gain is defined, and there could be an interplay between these two factors  
396 influencing the association between childhood weight gain and adult adiposity.

397 *Post malnutrition growth rate.*

398 Rapid weight gain in infancy has been defined as a weight-for-age Z score gain greater than 0.67  
399 between birth and 1.5 years [32]. Others have defined it as a change in WAZ  $> 0.67$  over an  
400 unspecified time period [33, 34]. Our study participants had a mean change in WAZ during  
401 rehabilitation (mean duration 37 days) that was more than 3 times the + 0.67 cut-off. Our statistical  
402 observation of associations between a one-unit change in WAZ per day ( $\Delta$ WAZ/day) and very  
403 large increases in lean mass and waist circumference must be interpreted with the caution that such  
404 an increase in WAZ is biologically implausible. Nevertheless, our findings call into question  
405 current guidelines which also recommend that a weight gain of  $>10$  g/kg/day during rehabilitation  
406 is desirable, as some of our participants who gained more than 10/g/kg/day during rehabilitation  
407 were shown to have greater adiposity as adults. In India, WAZ and g/kg/day disagreed  
408 substantially as methods for measuring growth velocity in more than a third of preterm children  
409 studied [35]. How the two measures agree in children born at term is unclear, however, among our

410 participants the two measures were similarly associated with measures of adult adiposity but not  
411 lean mass.

412 In summary, all three measures of in-treatment rehabilitation weight gain were associated with at  
413 least one measure of adult adiposity; the same was not true of the measures of post-hospitalization  
414 weight gain. While z-score is considered the most appropriate descriptor of malnutrition, among  
415 our participants rehabilitation weight gain in g/kg/day had the most consistent associations with  
416 adult NCD risk factors and has the additional advantage of being more applicable in clinical  
417 settings. Nevertheless, we were unable to draw conclusions regarding the most appropriate proxy  
418 for post-malnutrition weight gain from this study.

### 419 **Strengths and Limitations**

420 The strengths of the study include the uniqueness of the cohort and the availability of detailed  
421 anthropometric and body composition measures in children and adults. The low mortality  
422 (approximately 4%) minimizes the risk of survivor bias which limits some other malnutrition-  
423 survivor studies [36]. We acknowledge however that many post-hospitalization factors occurring  
424 in childhood, including the home diet and intercurrent illnesses, could have influenced the  
425 observed associations. Additionally, data relating to adult dietary intake, physical activity, and co-  
426 morbid conditions, all of which may confound the observed associations, were not evaluated.  
427 Finally, the participants in this study were Afro-Caribbean and the findings may be different in  
428 other ethnic groups and in other settings where other environmental and dietary conditions apply.

### 429 **Conclusion**

430 In this unique cohort of adult Afro-Caribbean severe malnutrition survivors, we demonstrated  
431 statistically significant associations between rehabilitation and post-hospitalization weight gain  
432 and adult NCD risk that were independent of admission weight and adult height. While the



433 implications of some of the findings are mixed, we have presented evidence of a risk of increased  
434 BMI and adiposity, especially abdominal adiposity, in these adults whose rehabilitation weight  
435 gain exceeded certain thresholds. Our findings raise the need to further explore the existing  
436 guidelines relating to weight gain targets during malnutrition treatment in childhood and  
437 underscore the need for further characterisation of optimal post-malnutrition weight gain in an  
438 interventional trial.

#### 439 **Acknowledgements**

440 We gratefully acknowledge the men and women who took part in the study. We also recognize  
441 support from the members of the CHANGE Study Collaborators' Group.

#### 442 **Financial Support Statement**

443 This work was supported by the UK Medical Research Council (grant number MR/V000802/1).  
444 The initial project was supported by the New Zealand Health Research Council Grant 09/052,  
445 Developmental Adaptation to an Obesogenic Environment Program.

446

447

448

449

450

451

452

453

## 454 References

- 455 1. Black, R.E., et al., *Maternal and child undernutrition and overweight in low-income and middle-*  
456 *income countries*. Lancet (London, England), 2013. **382**(9890): p. 427-451.
- 457 2. Nobili, V., et al., *Low birth weight and catch-up-growth associated with metabolic syndrome: a*  
458 *ten year systematic review*. *Pediatr Endocrinol Rev*, 2008. **6**(2): p. 241-7.
- 459 3. Darlow, B.A., J. Martin, and L.J. Horwood, *Metabolic Syndrome in Very Low Birth Weight Young*  
460 *Adults and Controls: The New Zealand 1986 VLBW Study*. *J Pediatr*, 2019. **206**: p. 128-133.e5.
- 461 4. Tennant, I.A., et al., *Impaired cardiovascular structure and function in adult survivors of severe*  
462 *acute malnutrition*. *Hypertension*, 2014. **64**(3): p. 664-71.
- 463 5. Thompson, D.S., et al., *Childhood severe acute malnutrition is associated with metabolic changes*  
464 *in adulthood*. *JCI Insight*, 2020. **5**(24).
- 465 6. Gonzalez-Barranco, J., et al., *Effect of malnutrition during the first year of life on adult plasma*  
466 *insulin and glucose tolerance*. *Metabolism*, 2003. **52**(8): p. 1005-11.
- 467 7. WHO, *Guideline: Updates on the Management of Severe Acute Malnutrition in Infants and*  
468 *Children*. 2013.
- 469 8. WHO, *Pocket Book of Hospital Care for Children: Guidelines for the Management of Common*  
470 *Childhood Illnesses*. 2nd Edition ed. Severe acute malnutrition. 2013, Geneva: WHO.
- 471 9. Hales, C.N. and D.J. Barker, *The thrifty phenotype hypothesis*. *Br Med Bull*, 2001. **60**: p. 5-20.
- 472 10. Boyne, M.S., et al., *Cardiometabolic Risk in Marasmus and Kwashiorkor Survivors*, in *Handbook*  
473 *of Famine, Starvation, and Nutrient Deprivation: From Biology to Policy*, V. Preedy and V.B. Patel,  
474 Editors. 2017, Springer International Publishing: Cham. p. 1-23.
- 475 11. Miranda, J.J., et al., *Understanding the rise of cardiometabolic diseases in low- and middle-*  
476 *income countries*. *Nat Med*, 2019. **25**(11): p. 1667-1679.
- 477 12. WHO. *Noncommunicable Diseases*. 2021 13 April 2021 [cited 2021; Available from:  
478 <https://www.who.int/news-room/fact-sheets/detail/noncommunicable-diseases>.
- 479 13. Francis-Emmanuel, P.M., et al., *Glucose metabolism in adult survivors of severe acute*  
480 *malnutrition*. *J Clin Endocrinol Metab*, 2014. **99**(6): p. 2233-40.
- 481 14. Campbell CP, R.D., Badaloo AV, Gluckman PD, Martinez C, Gosby A, Simpson SJ, Osmond C,  
482 Boyne MS, Forrester TE, *Developmental contributions to macronutrient selection: a randomized*  
483 *controlled trial in adult survivors of malnutrition*. *Evol Med Public Health*, 2016(1): p. 158.69.
- 484 15. Sheppard, A., et al., *Molecular evidence for differential long-term outcomes of early life severe*  
485 *acute malnutrition*. *EBioMedicine*, 2017.
- 486 16. Waterlow, J.C., A. Tomkins, and S.M. Grantham-McGregor, *Protein-energy malnutrition*. 1992:  
487 Edward Arnold, Hodder and Stoughton.
- 488 17. Picou, D., U.o.t.W.I.T.M.R. Unit, and U.o.t.W.I.D.o. Paediatrics, *Malnutrition and Gastroenteritis*  
489 *in Children: A Manual for Hospital Treatment and Management*. 1978: Caribbean Food and  
490 Nutrition Institute.
- 491 18. *The Treatment and management of severe protein-energy malnutrition*. 1981, World Health  
492 Organization: Geneva.
- 493 19. Thompson, D.S., et al., *Nonalcoholic Fatty Liver Disease in Nonobese Subjects of African Origin*  
494 *Has Atypical Metabolic Characteristics*. *Journal of the Endocrine Society*, 2019. **3**(11): p. 2051-  
495 2063.
- 496 20. Waterlow, J.C., M. Golden, and J. Patrick, *Protein energy malnutrition: Treatment*. 1978. p. 49-  
497 71.
- 498 21. Alpizar, M., et al., *Fat Mass Index (FMI) as a Trustworthy Overweight and Obesity Marker in*  
499 *Mexican Pediatric Population*. *Children (Basel)*, 2020. **7**(3).

- 500 22. Kwon, H., D. Kim, and J.S. Kim, *Body Fat Distribution and the Risk of Incident Metabolic*  
501 *Syndrome: A Longitudinal Cohort Study*. Scientific Reports, 2017. **7**(1): p. 10955.
- 502 23. Sari, C.I., et al., *Android Fat Deposition and Its Association With Cardiovascular Risk Factors in*  
503 *Overweight Young Males*. Front Physiol, 2019. **10**: p. 1162.
- 504 24. Nakano, Y., *Adult-Onset Diseases in Low Birth Weight Infants: Association with Adipose Tissue*  
505 *Maldevelopment*. J Atheroscler Thromb, 2020. **27**(5): p. 397-405.
- 506 25. Demerath, E.W., et al., *Rapid postnatal weight gain and visceral adiposity in adulthood: the Fels*  
507 *Longitudinal Study*. Obesity (Silver Spring), 2009. **17**(11): p. 2060-6.
- 508 26. Scheuer, S.H., et al., *Abdominal Fat Distribution and Cardiovascular Risk in Men and Women*  
509 *With Different Levels of Glucose Tolerance*. J Clin Endocrinol Metab, 2015. **100**(9): p. 3340-7.
- 510 27. Katzmarzyk, P.T., et al., *Racial differences in abdominal depot-specific adiposity in white and*  
511 *African American adults*. Am J Clin Nutr, 2010. **91**(1): p. 7-15.
- 512 28. Hoffman, D.J., et al., *Comparison of visceral adipose tissue mass in adult African Americans and*  
513 *whites*. Obes Res, 2005. **13**(1): p. 66-74.
- 514 29. Okosun, I.S., J.P. Seale, and R. Lyn, *Commingle effect of gynoid and android fat patterns on*  
515 *cardiometabolic dysregulation in normal weight American adults*. Nutrition & Diabetes,  
516 2015. **5**: p. e155.
- 517 30. Wells, J.C.K. and M.K. Shirley, *Body composition and the monitoring of non-communicable*  
518 *chronic disease risk*. Glob Health Epidemiol Genom, 2016. **1**: p. e18.
- 519 31. Grijalva-Eternod, C.S., D.A. Lawlor, and J.C. Wells, *Testing a capacity-load model for*  
520 *hypertension: disentangling early and late growth effects on childhood blood pressure in a*  
521 *prospective birth cohort*. PLoS One, 2013. **8**(2): p. e56078.
- 522 32. Zhou, J., et al., *Rapid Infancy Weight Gain and 7- to 9-year Childhood Obesity Risk: A Prospective*  
523 *Cohort Study in Rural Western China*. Medicine (Baltimore), 2016. **95**(16): p. e3425.
- 524 33. Penny, M.E., M.M. Jimenez, and R.M. Marin, *Early rapid weight gain and subsequent overweight*  
525 *and obesity in middle childhood in Peru*. BMC Obes, 2016. **3**: p. 55.
- 526 34. Lin, Q., et al., *Combined effects of weight change trajectories and eating behaviors on childhood*  
527 *adiposity status: A birth cohort study*. Appetite, 2021. **162**: p. 105174.
- 528 35. Simon, L., et al., *Neonatal growth velocity of preterm infants: The weight Z-score change versus*  
529 *Patel exponential model*. PLoS One, 2019. **14**(6): p. e0218746.
- 530 36. Lelijveld, N., et al., *Chronic disease outcomes after severe acute malnutrition in Malawian*  
531 *children (ChroSAM): a cohort study*. Lancet Glob Health, 2016. **4**(9): p. e654-62.

532

533
